# Supplementary material
Source: PubMed Central journal article supplement (PMC3988354)

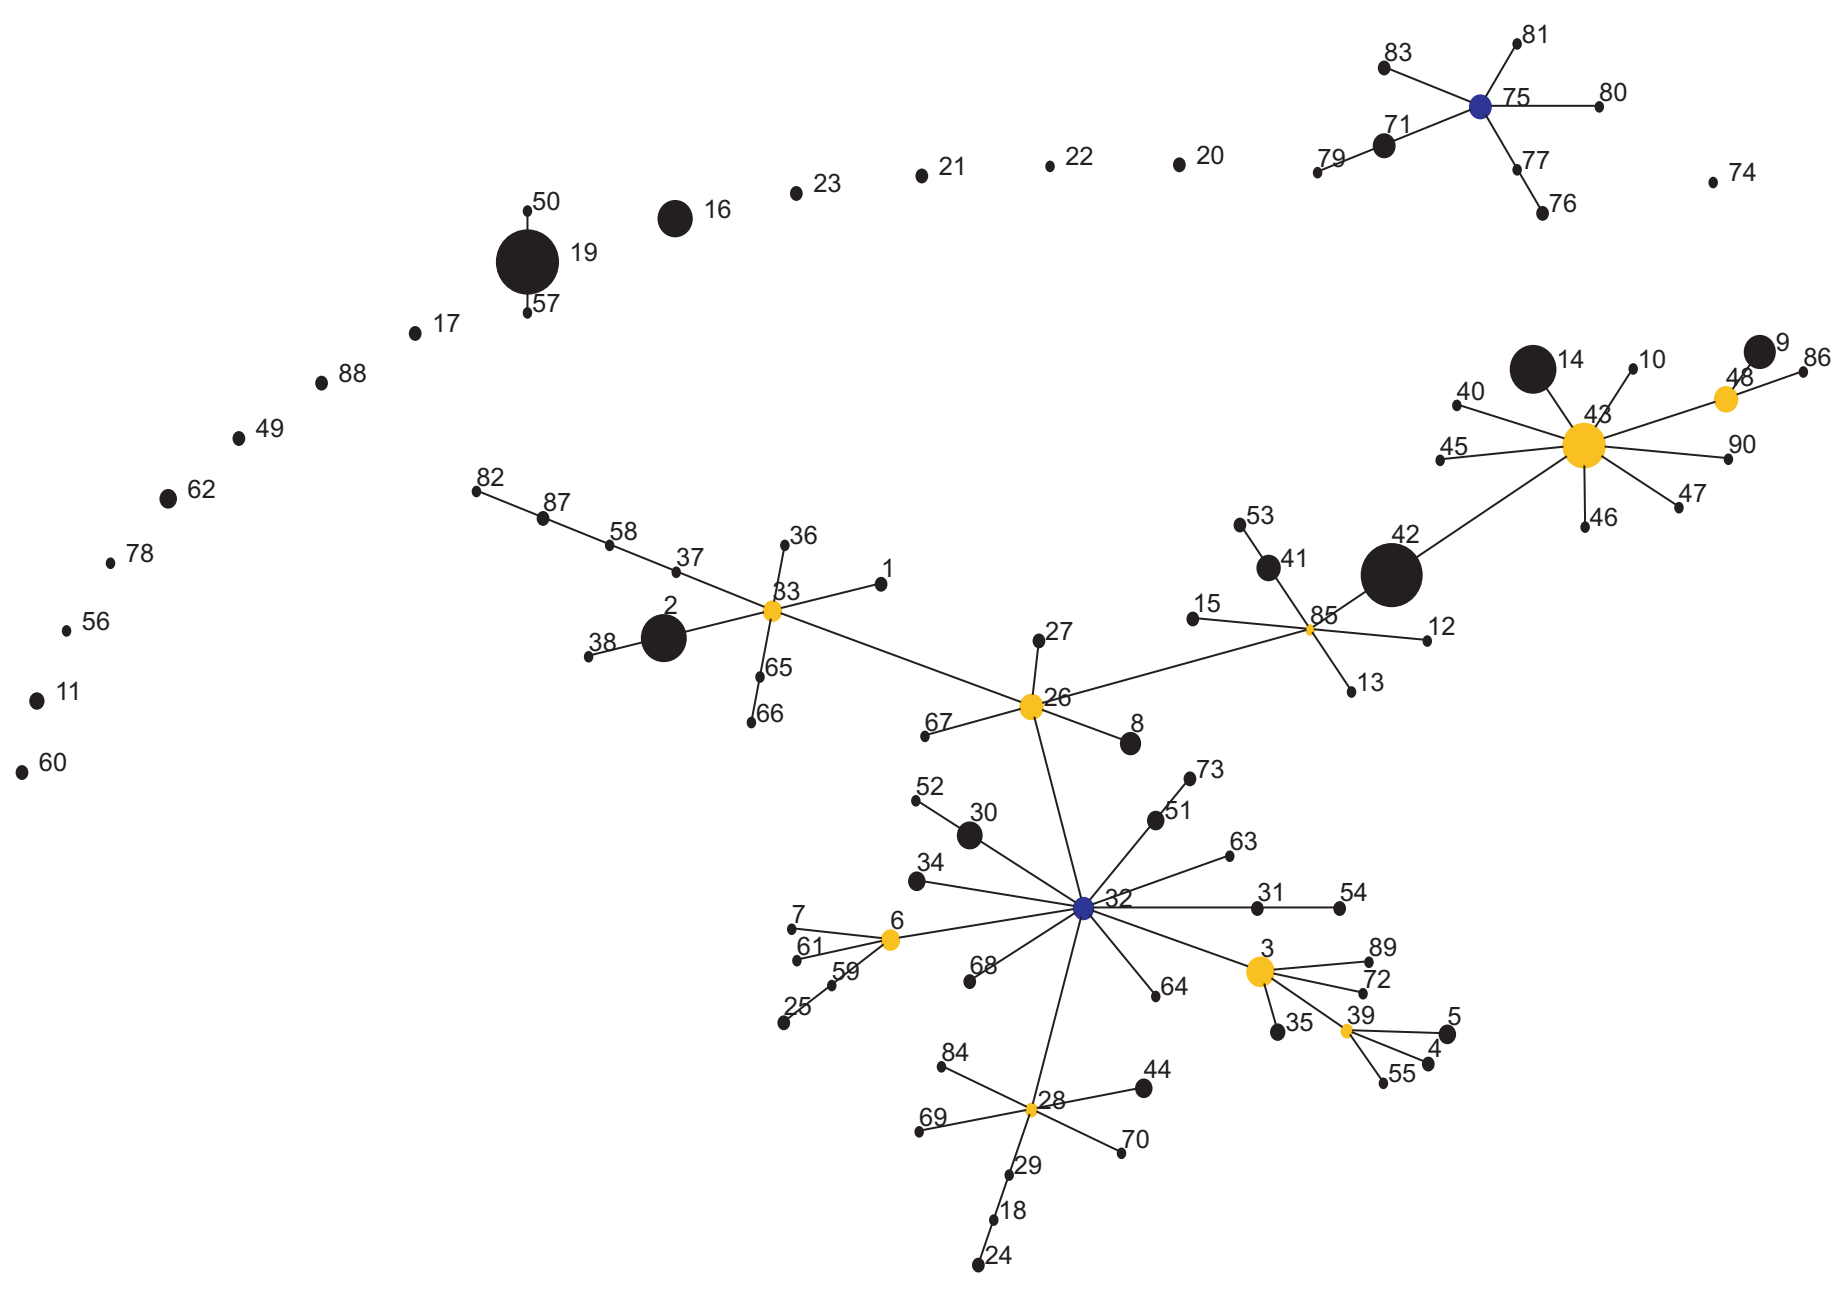

Supplement: NIHMS57945-supplement-Supplementary_figure_1.pdf [file NIHMS57945-supplement-Supplementary_figure_1.pdf]

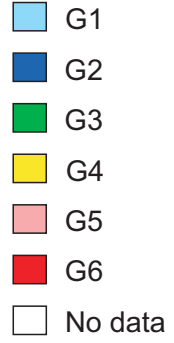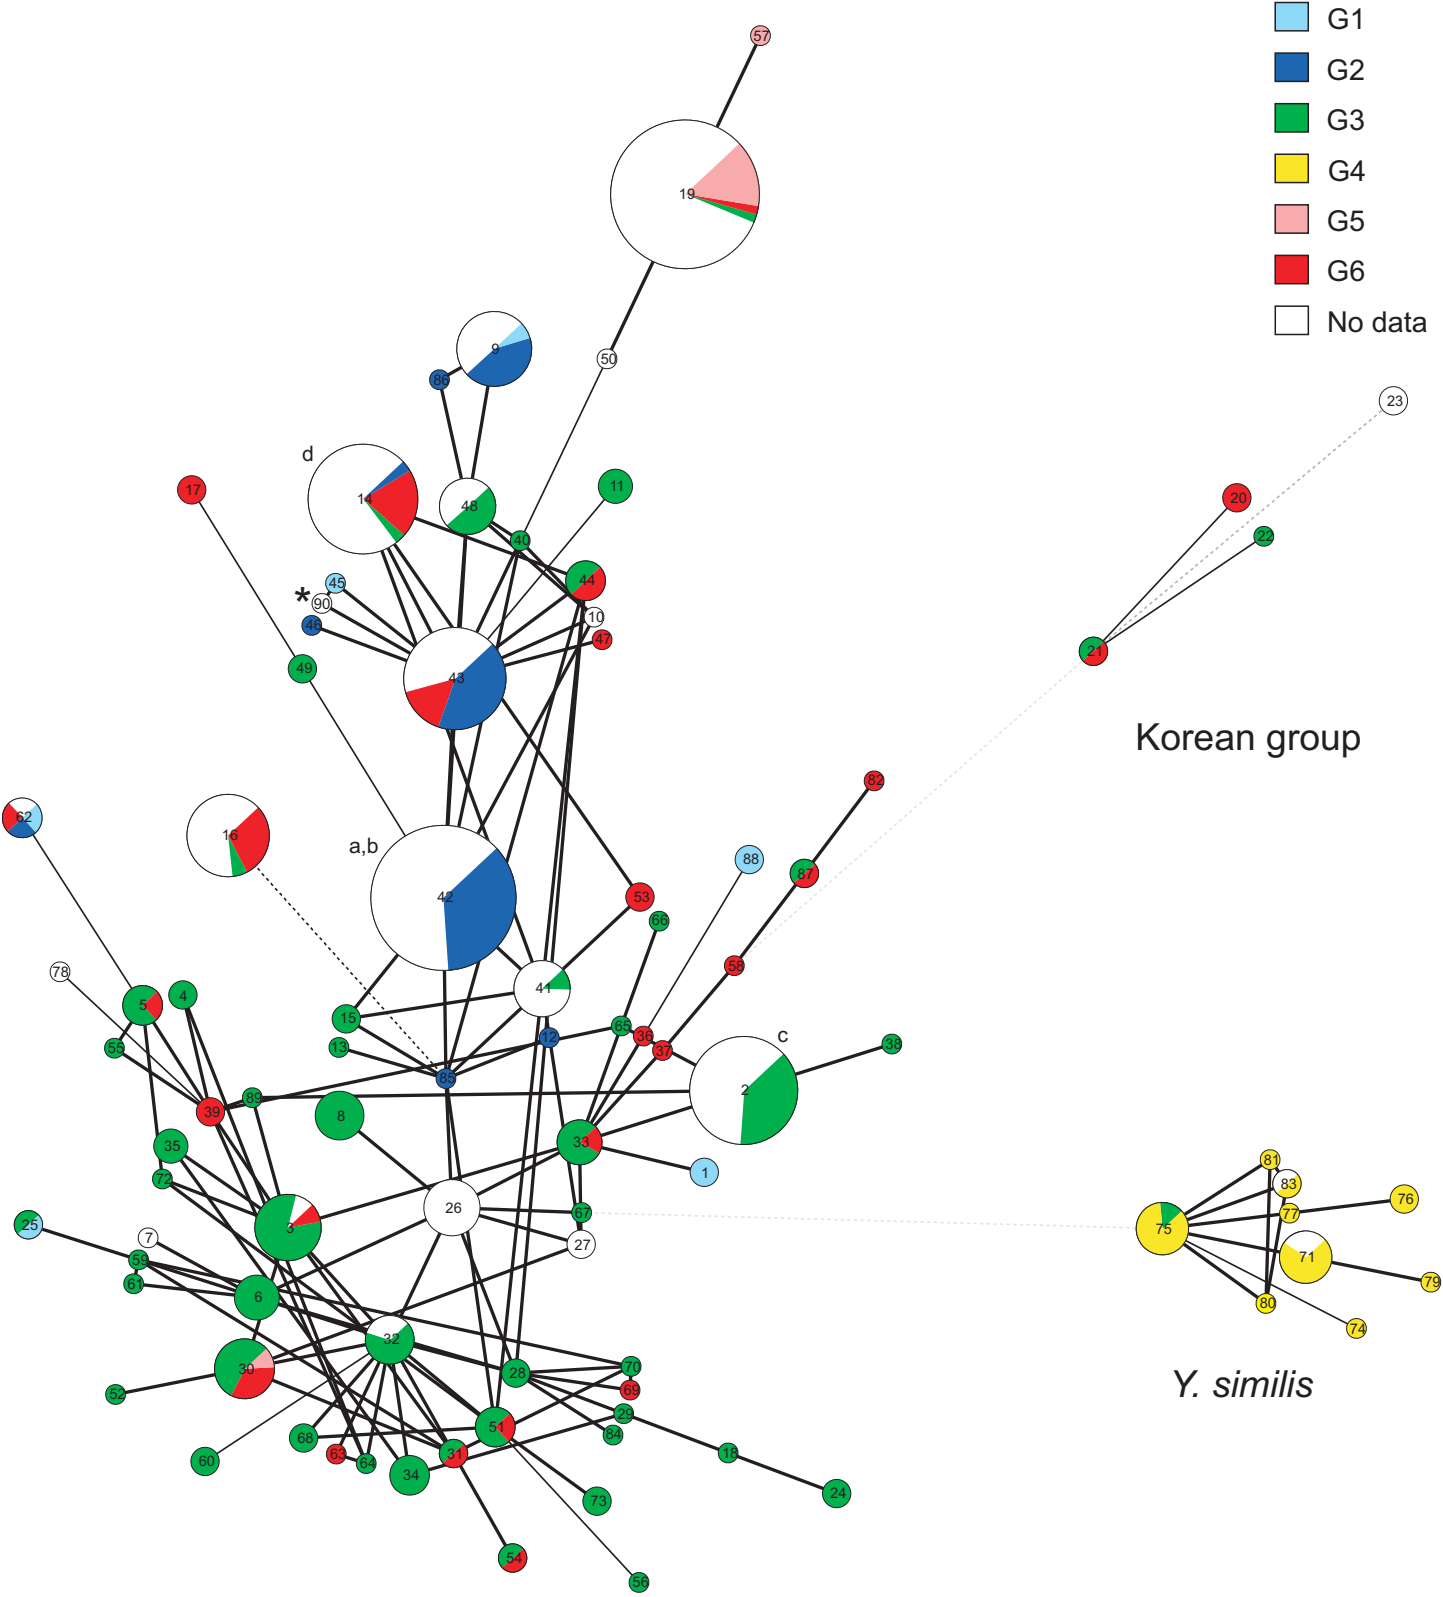

*Y. pseudotuberculosis s.s.*

Korean group

*Y. similis*

Supplement: NIHMS57945-supplement-Supplementary_figure_2.pdf [file NIHMS57945-supplement-Supplementary_figure_2.pdf]

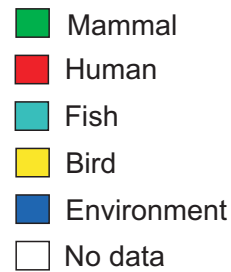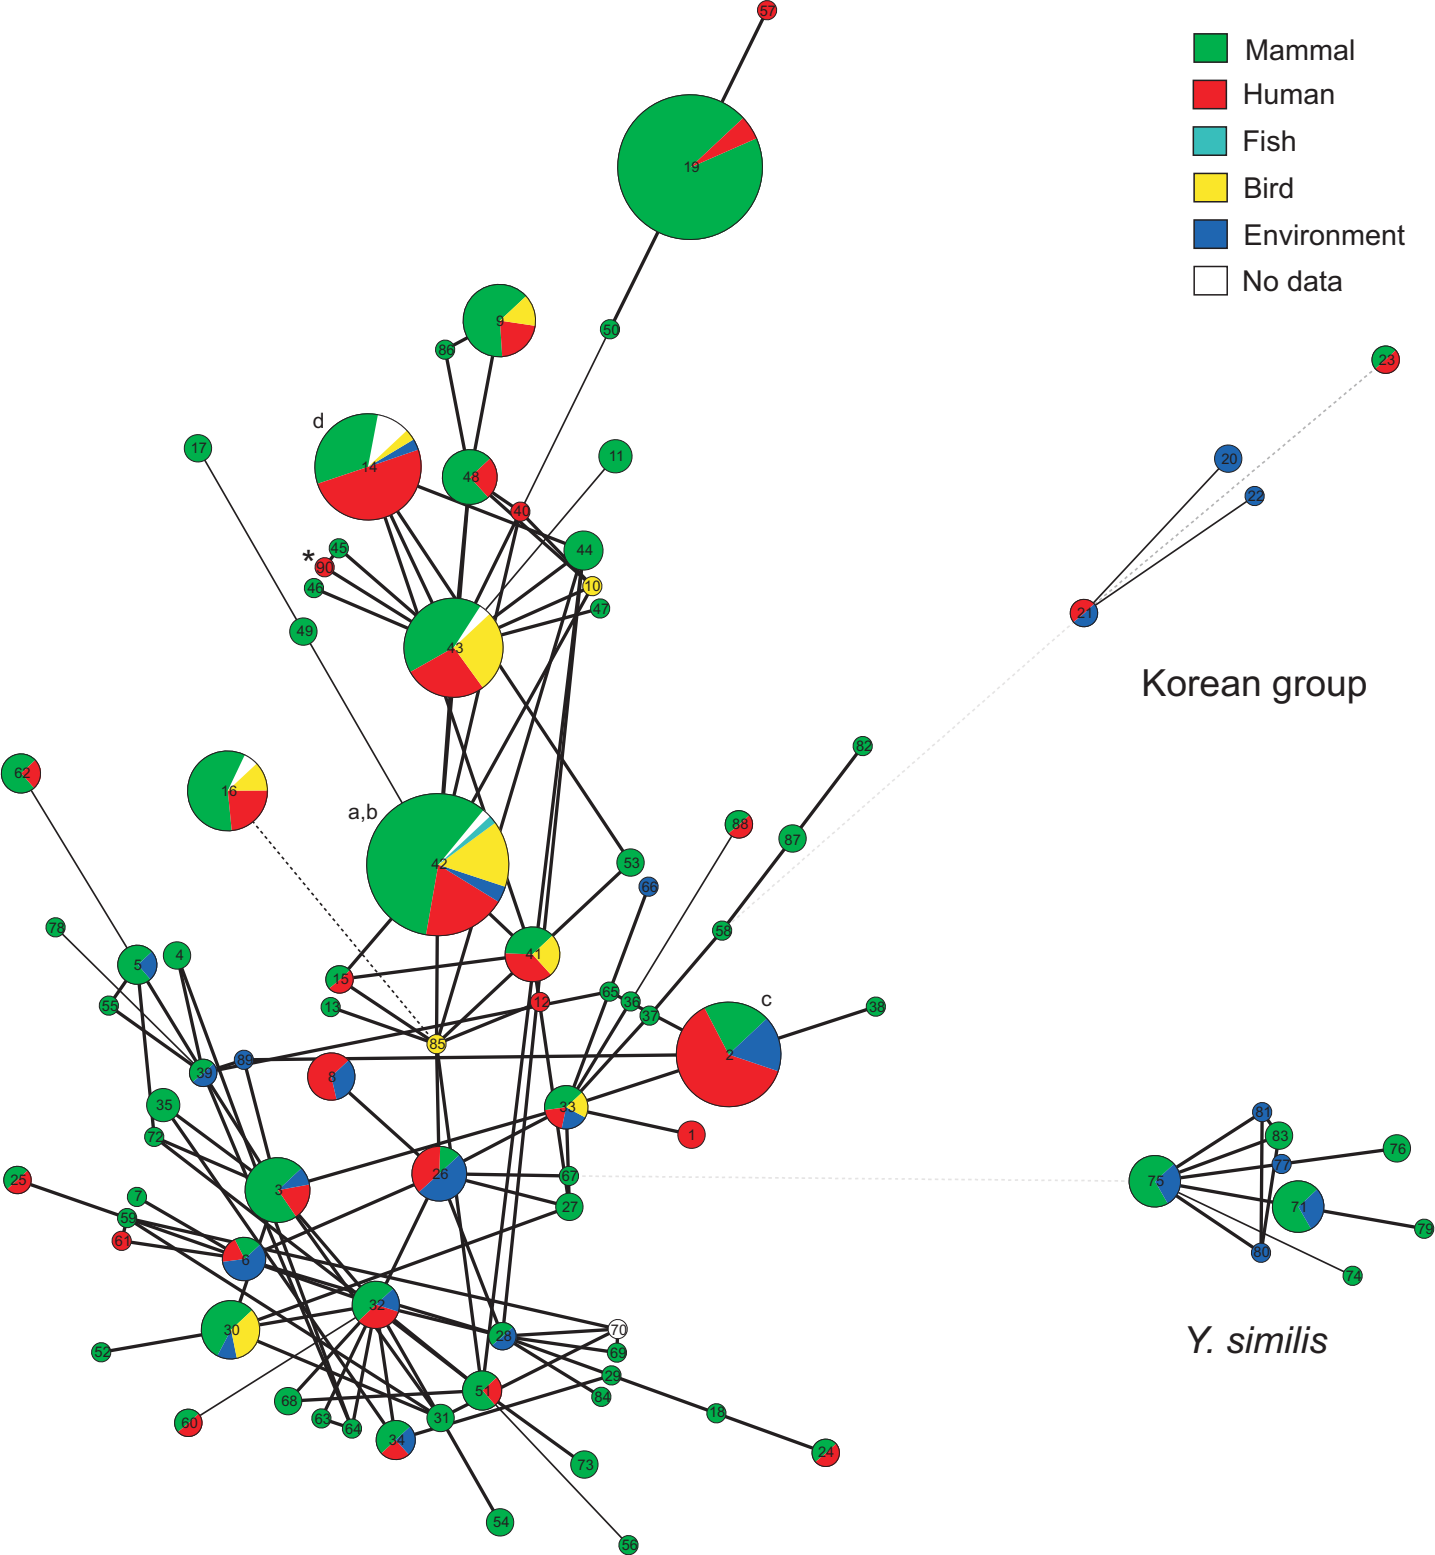

*Y. pseudotuberculosis s.s.*

*Y. similis*

Supplement: NIHMS57945-supplement-Supplementary_figure_3.pdf [file NIHMS57945-supplement-Supplementary_figure_3.pdf]

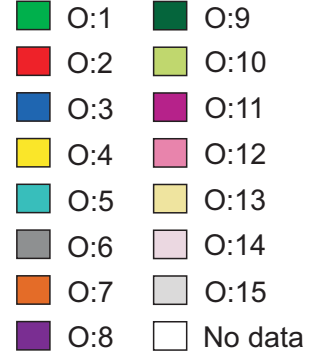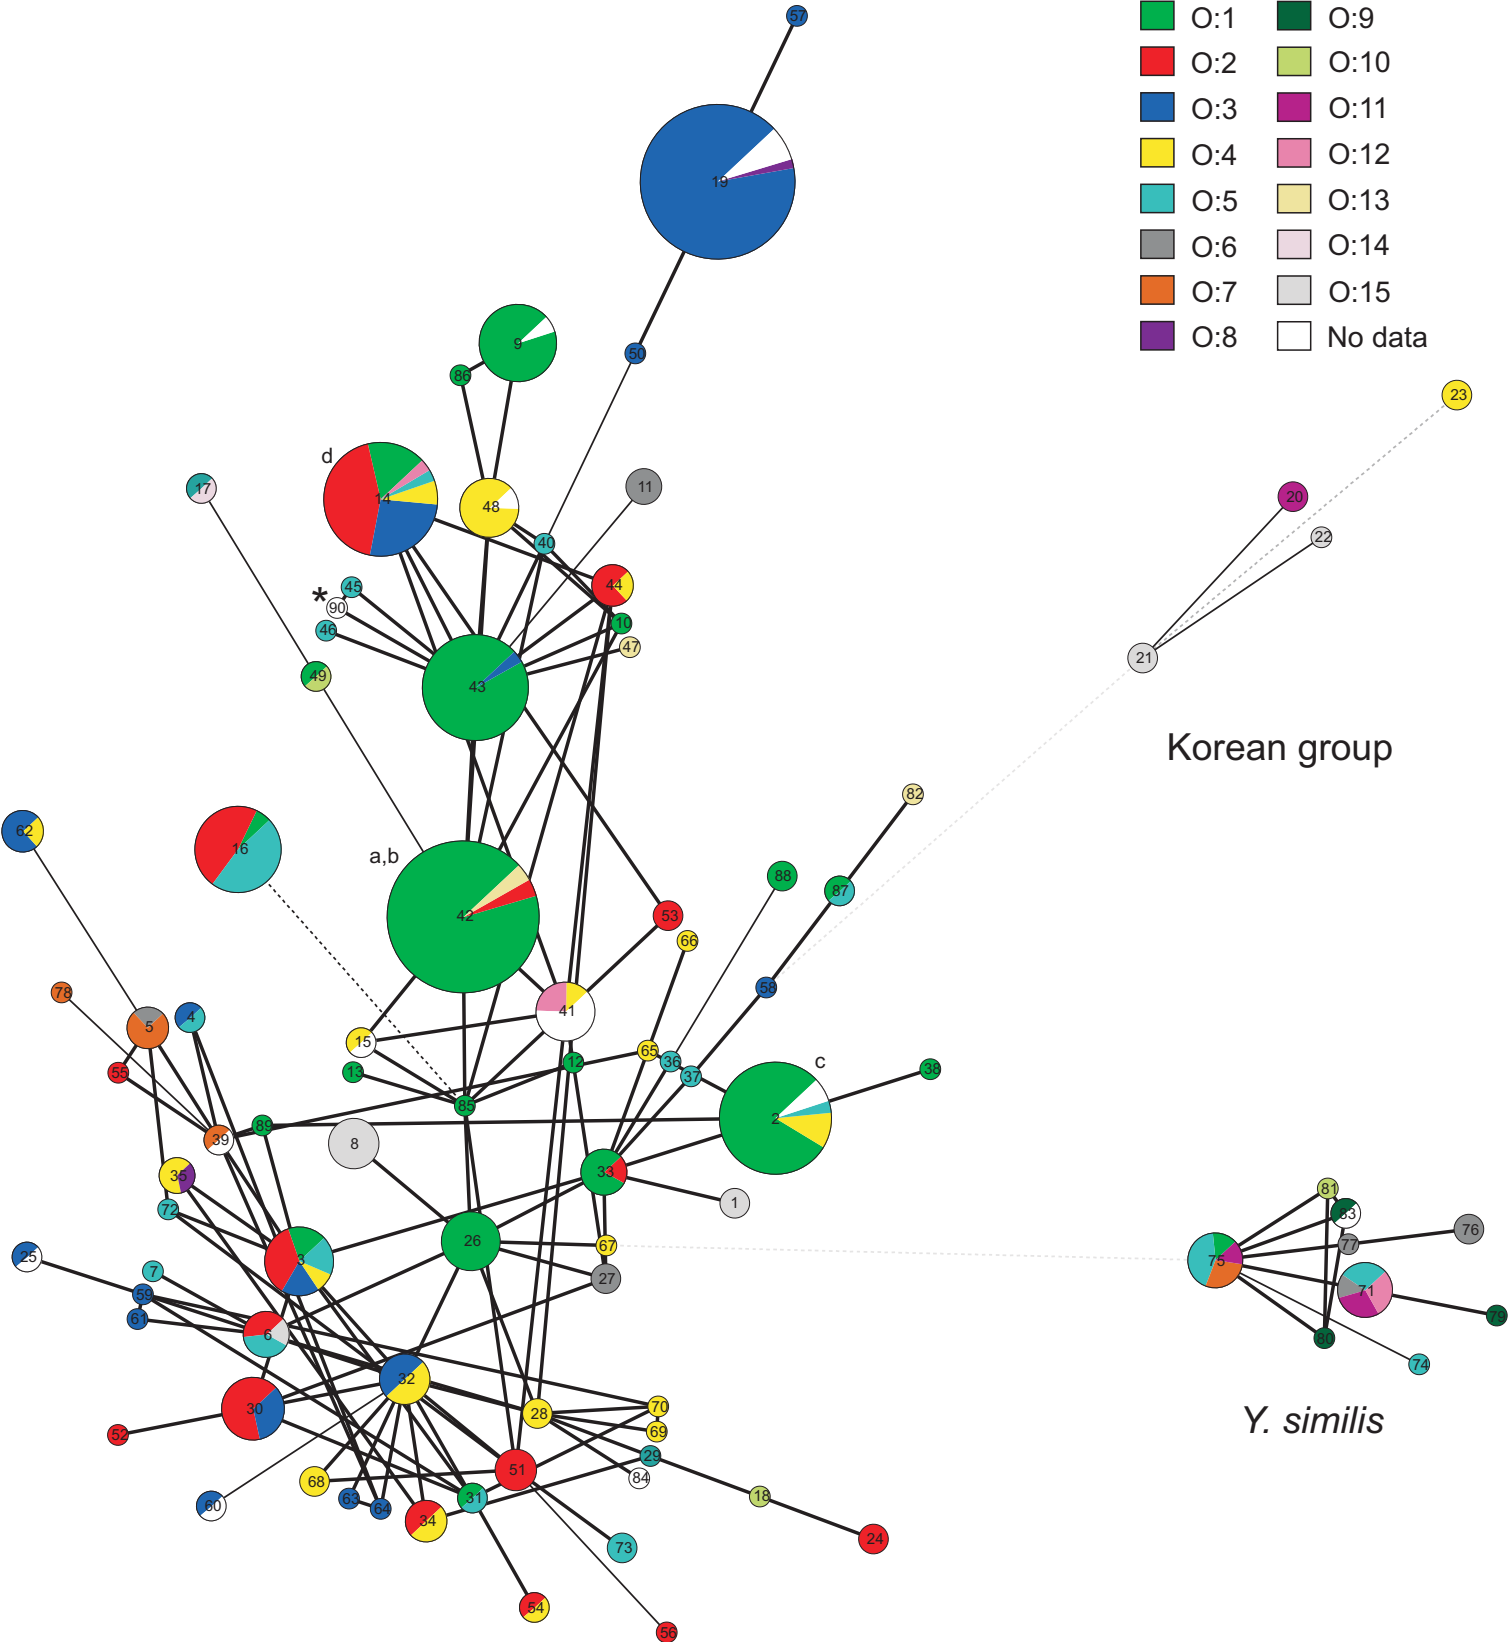

*Y. pseudotuberculosis s.s.*

*Y. similis*

Supplement: NIHMS57945-supplement-Supplementary_figure_4.pdf [file NIHMS57945-supplement-Supplementary_figure_4.pdf]

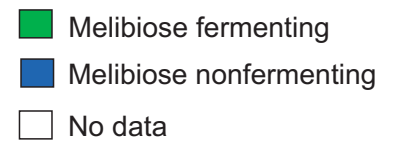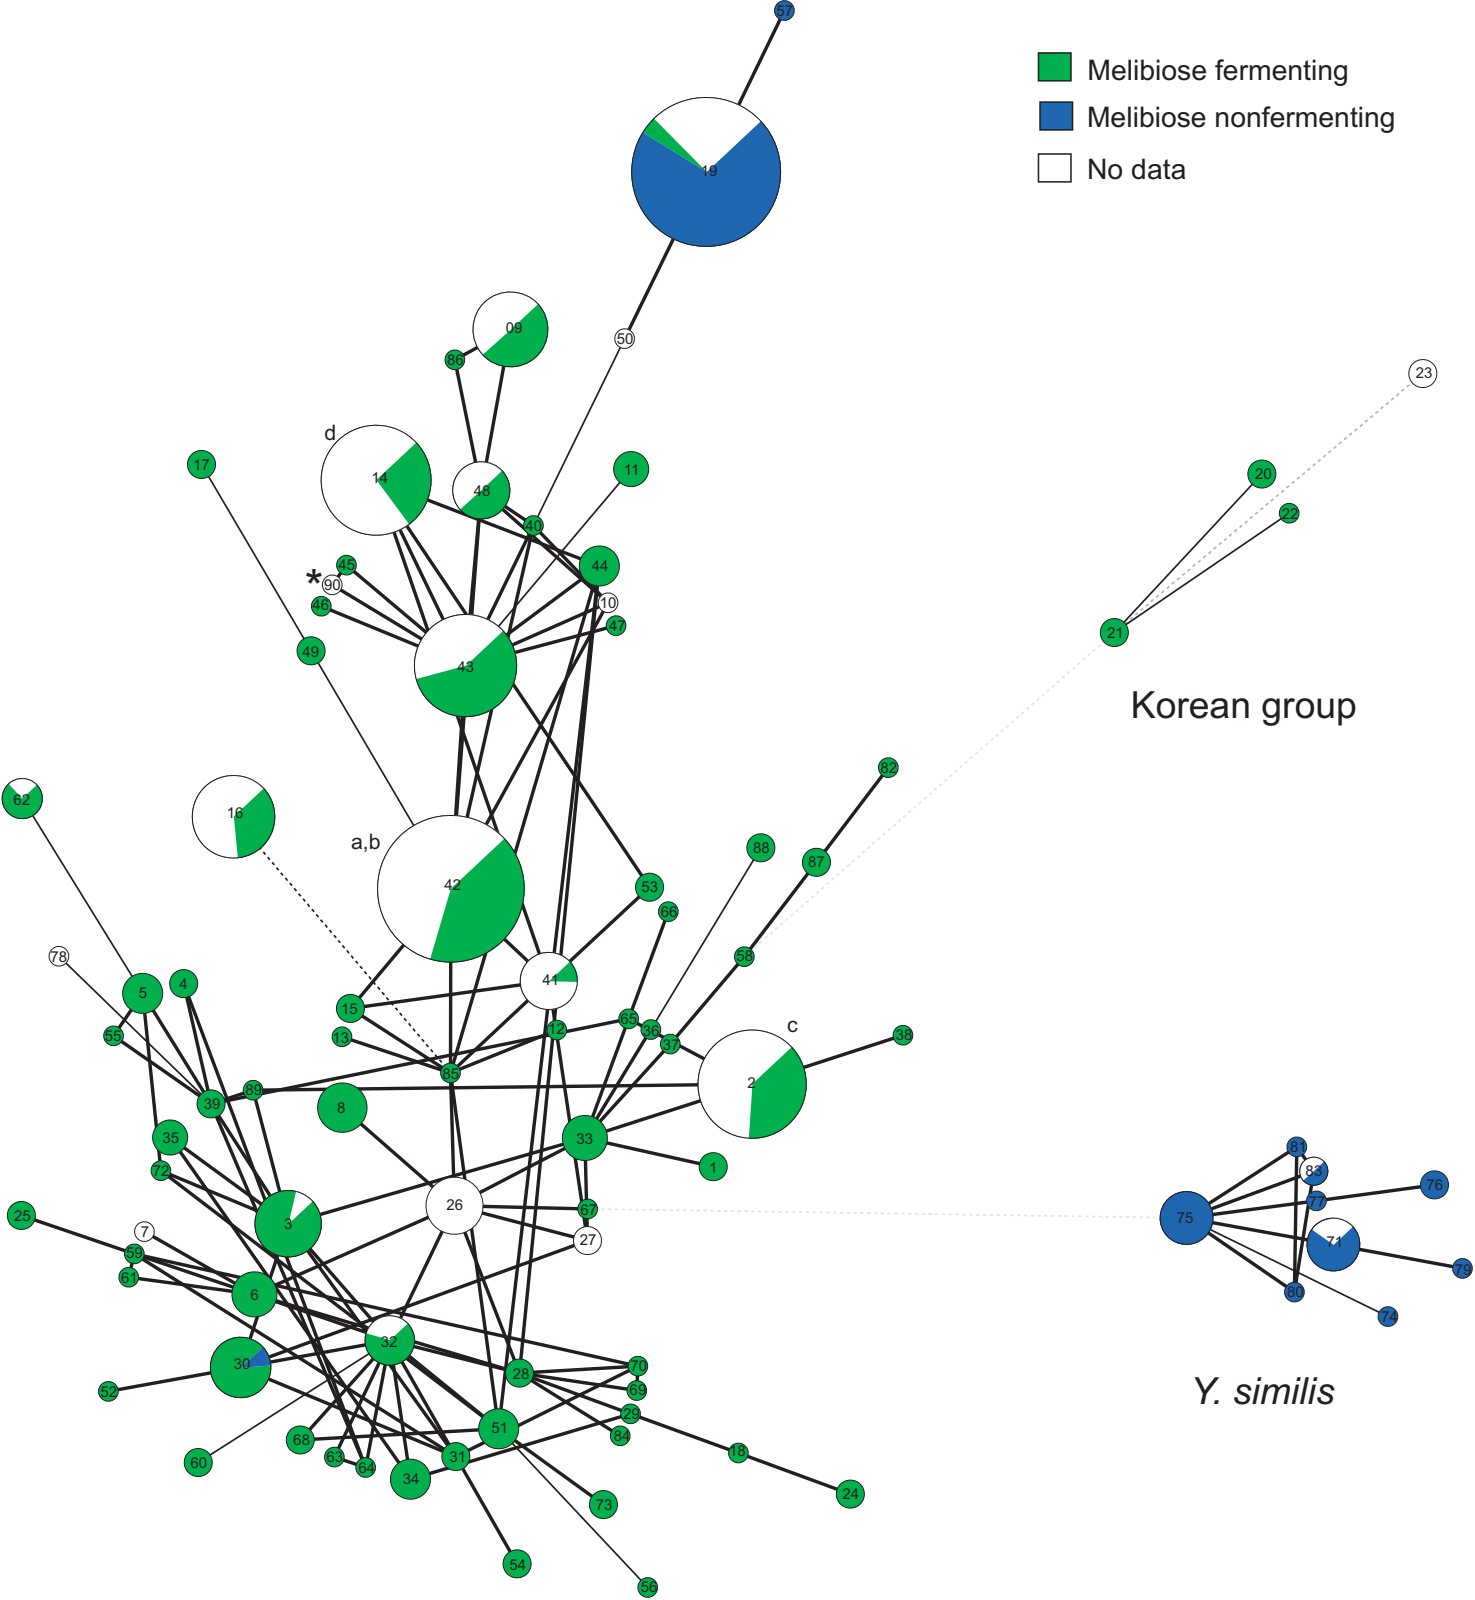

*Y. pseudotuberculosis s.s.*

Korean group

*Y. similis*

Supplement: NIHMS57945-supplement-Supplementary_figure_5.pdf [file NIHMS57945-supplement-Supplementary_figure_5.pdf]
